# Supplementary material for: 195 要介護高齢者における筋力向上トレーニングの効果について(生活環境支援系理学療法9)
Source: Oxford University Press journal article supplement (doi:10.1182/blood.2022017755), 2005-04-20

## SUPPLEMENTAL DATA

### **Prognostic value and oncogenic landscape of *TP53* alterations in adult and pediatric T-ALL**

#### **Contents:**

#### **1. Supplemental Methods and references**

#### **2. Supplemental Figures:**

- a)** Supplemental **Figure 1:** Flowchart of FRALLE2000 and GRAALL0305 patients
- b)** Supplemental **Figure 2:** Flow chart of the study cohort patients versus not investigated patients
- c)** Supplemental **Figure 3:** Overall Survival (OS) and Cumulative Incidence of Relapse (CIR) of the study cohort patients versus not investigated patients.
- d)** Supplemental **Figure 4:** Co-occurrences and mutual exclusions of genetic alterations in *TP53<sup>Alt</sup>* and *TP53<sup>WT</sup>* T-ALL
- e)** Supplemental **Figure 5:** Oncoplot depicting the genetic anomalies observed in *TP53* Altered or Wild-type T-ALL cases of the GRAALL03/05 and FRALLE2000 studies
- f)** Supplemental **Figure 6:** Oncoplot depicting the genetic anomalies observed in *TP53* Altered or Wild-type T-ALL cases of the GRAALL03/05 and FRALLE2000 studies
- g)** Supplemental **Figure 7:** OS and CIR of FRALLE2000 (pediatric) and GRAALL0305 (adults) patients

#### **3. Supplemental Tables:**

- a)** Supplemental **Table 1:** Clinical features and outcome of the study cohort patients versus not investigated patients
- b)** Supplemental **Table 2:** Custom capture Nextera XT gene panel (p.4)
- c)** Supplemental **Table 3:** Clinical features of the 21 patients with *TP53* alterations identified among the 476 screened patients with T-ALL (FRALLE2000 and GRAALL0305 protocols)

26    **d)** Supplemental **Table 4**: Pathogenicity analysis of the 8 TP53 mutations identified among the 476 T-  
27    ALL patients

28    **e)** Supplemental **Table 5**: Mutational landscape of *TP53<sup>Alt</sup>* vs *TP53<sup>WT</sup>* T-ALL

29

## **SUPPLEMENTAL METHODS**

### **Patient's protocol and clinical trials**

Diagnostic peripheral blood or bone marrow samples from 476 adults and children with T-ALL were analyzed after informed consent was obtained at diagnosis according to the Declaration of Helsinki.

Adult patients aged from 16-59 years, were included in the GRAALL03/05 trials which were registered at clinicaltrials.gov (GRAALL-2003, #NCT00222027; GRAALL-2005, #NCT00327678).

Pediatric patients aged from 1-19 years, were treated in 10 French pediatric hematology departments, members of the FRALLE study group, according to the FRALLE 2000 T guidelines:

Definitions: Good prednisone response (GPR) was defined as  $< 1000$  circulating blasts/ $\mu\text{L}$  on day 8, poor prednisone response (PPR) when  $\geq 1000$  circulating blasts/ $\mu\text{L}$  on day 8. Morphologic assessment of a bone marrow aspirate was done at day 21. A chemosensitivity was represented by  $\leq 5\%$  blasts, a chemoresistance by  $> 5\%$ . Complete remission (CR) was defined as: absence of physical signs of leukemia, bone marrow with active hematopoiesis and  $< 5\%$  leukemic blast cells (identified morphologically), and normal cerebrospinal fluid. Patients were stratified into two groups.

Treatment stratification: Standard risk group (T1) was defined by the presence of all the following criteria: good prednisone response (GPR) at day 8, chemosensitivity (CHs) at day 21, MRD  $< 10^{-2}$  at day 35. High risk group (T2) was defined by the presence of one of the following criteria: poor prednisone response (PPR) at day 8, chemoresistance at day 21 or MRD  $\geq 10^{-2}$  at day 35. Patients treated according to T2 group were eligible for allogeneic stem cell transplantation (SCT) after late intensification n°1 when a matched sibling or unrelated donor was available.

### **Immunophenotypic and molecular characterization of T-ALL samples**

Peripheral blood (PB) or bone marrow (BM) T-ALL samples were analyzed for immunophenotype, fusion transcripts (SIL-TAL1, CALM-AF10), oncogenic transcripts (HOXA9, TLX1 and TLX3), and T-cell receptor (TCR) recombination and NOTCH1/FBXW7/RAS/PTEN mutations, as previously described.<sup>1-3</sup>

### **Minimal residual disease assessment**

Immunoglobulin/T-cell receptor (Ig/TCR) gene rearrangement based MRD evaluation was centrally assessed for patients who reached complete remission after the first induction cycle, on BM samples after induction (MRD1). MRD was centrally assessed by real-time quantitative allele-specific oligonucleotide PCR and interpreted according to EuroMRD group guidelines.<sup>4-6</sup>

## Gene mutation screening

A custom capture Nextera XT gene panel (Illumina, San Diego, CA) targeting all coding exons and their adjacent splice junctions of 63 genes was designed, based on available evidence in hematological neoplasms (**supplemental Table 1**). DNA Libraries were prepared using Nextera Rapid Capture Enrichment protocol and underwent 2x150bp paired-end sequencing on Illumina MiSeq sequencing system with MiSeq Reagent Kit v2 (Illumina). Briefly, sequence reads were filtered and mapped to the human genome (GRCh37/hg19) using in-house software (Polyweb, Institut Imagine, Paris). Annotated variants were selected after filtering out calls according to the following criteria: (i) coverage < 30x, <10 alternative reads or variant allelic fraction (VAF) <7%; (ii) Polymorphisms described in dbSNP, 1000Genomes, EVS, Gnomad and EXAC with a calculated mean population frequency >0.1%. Non-filtered variants were annotated using somatic database COSMIC (version 78) and ProteinPaint (St Jude Children's Research Hospital – Pediatric Cancer data portal), published data and in-silico prediction effect.

## SUPPLEMENTAL REFERENCES

1. Asnafi V, Beldjord K, Boulanger E, et al. Analysis of TCR, pT alpha, and RAG-1 in T-acute lymphoblastic leukemias improves understanding of early human T-lymphoid lineage commitment. *Blood*. 2003;101(7):2693–2703.
2. Bond J, Marchand T, Touzart A, et al. An early thymic precursor phenotype predicts outcome exclusively in HOXA-overexpressing adult T-cell acute lymphoblastic leukemia: a Group for Research in Adult Acute Lymphoblastic Leukemia study. *Haematologica*. 2016;101(6):732–740.
3. Trinquand A, Tanguy-Schmidt A, Ben Abdelali R, et al. Toward a NOTCH1/FBXW7/RAS/PTEN-based oncogenetic risk classification of adult T-cell acute lymphoblastic leukemia: a Group for Research in Adult Acute Lymphoblastic Leukemia study. *J. Clin. Oncol*. 2013;31(34):4333–4342.
4. van Dongen JJM, Lhermitte L, Böttcher S, et al. EuroFlow antibody panels for standardized n-dimensional flow cytometric immunophenotyping of normal, reactive and malignant leukocytes. *Leukemia*. 2012;26(9):1908–1975.
5. Pongers-Willemse MJ, Verhagen OJ, Tibbe GJ, et al. Real-time quantitative PCR for the detection of minimal residual disease in acute lymphoblastic leukemia using junctional region specific TaqMan probes. *Leukemia*. 1998;12(12):2006–2014.
6. van der Velden VHJ, Cazzaniga G, Schrauder A, et al. Analysis of minimal residual disease by Ig/TCR gene rearrangements: guidelines for interpretation of real-time quantitative PCR data. *Leukemia*. 2007;21(4):604–611.

**Supplemental Figure 1.**  
Flow chart of FRALLE2000 and GRAALL0305 patients.

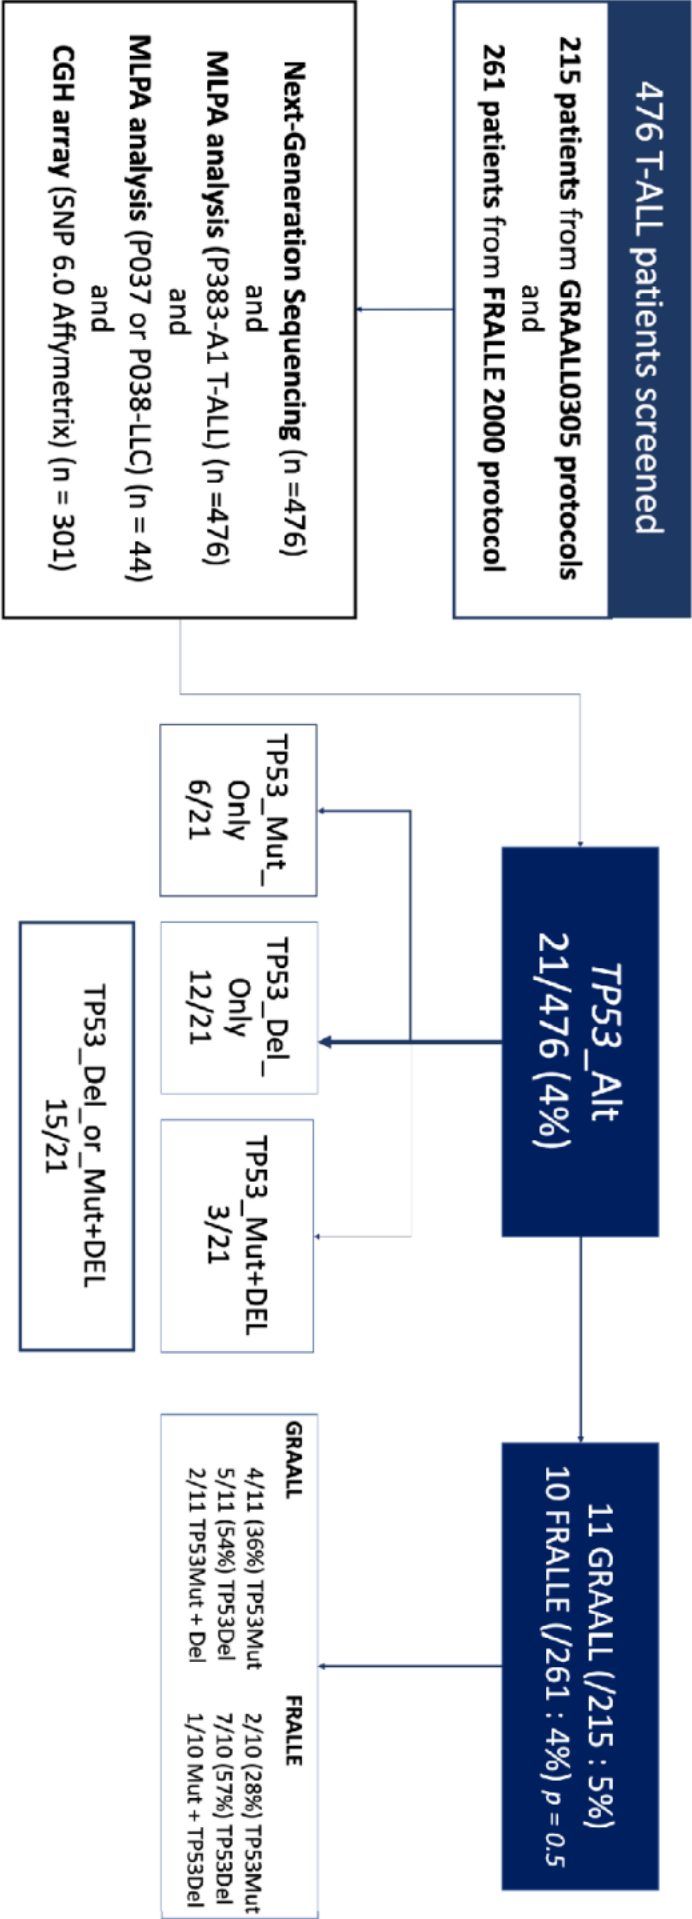

**Supplemental Figure 2.**

Flow chart of the study cohort patients versus not investigated patients.

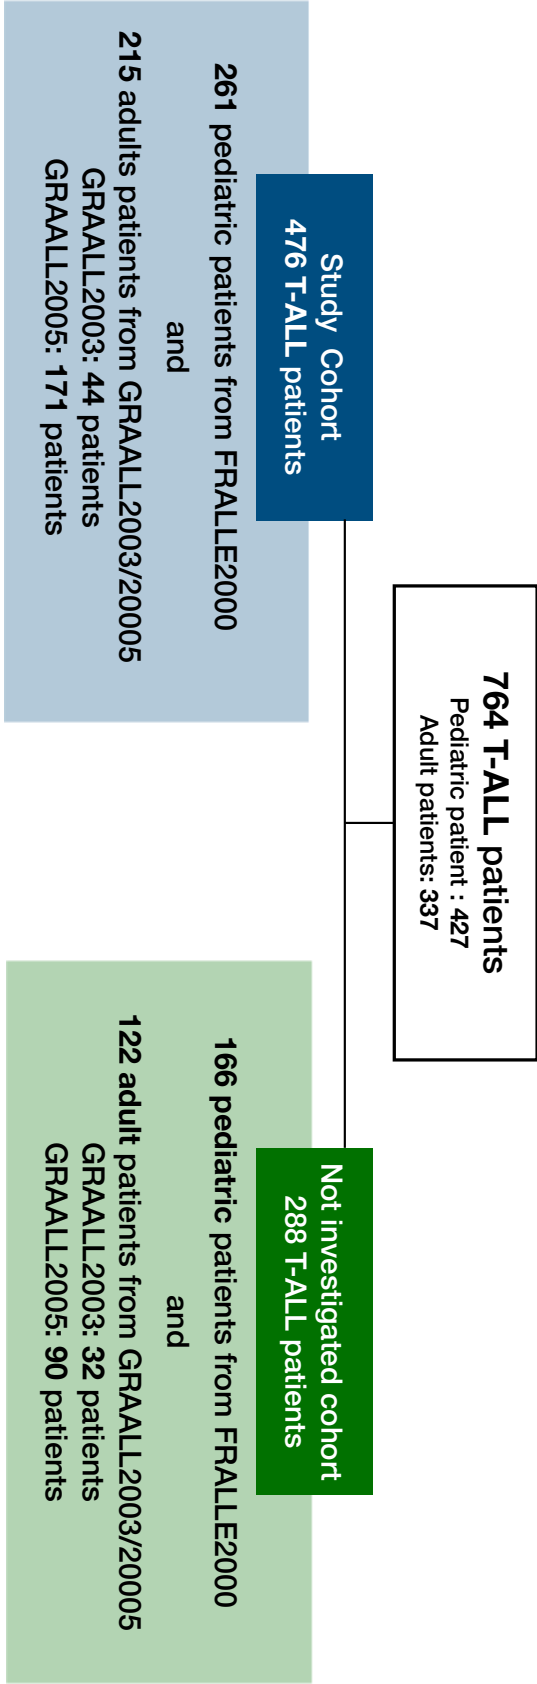

**Supplemental Figure 3.**  
OS and CIR of the study cohort patients versus not investigated patients.

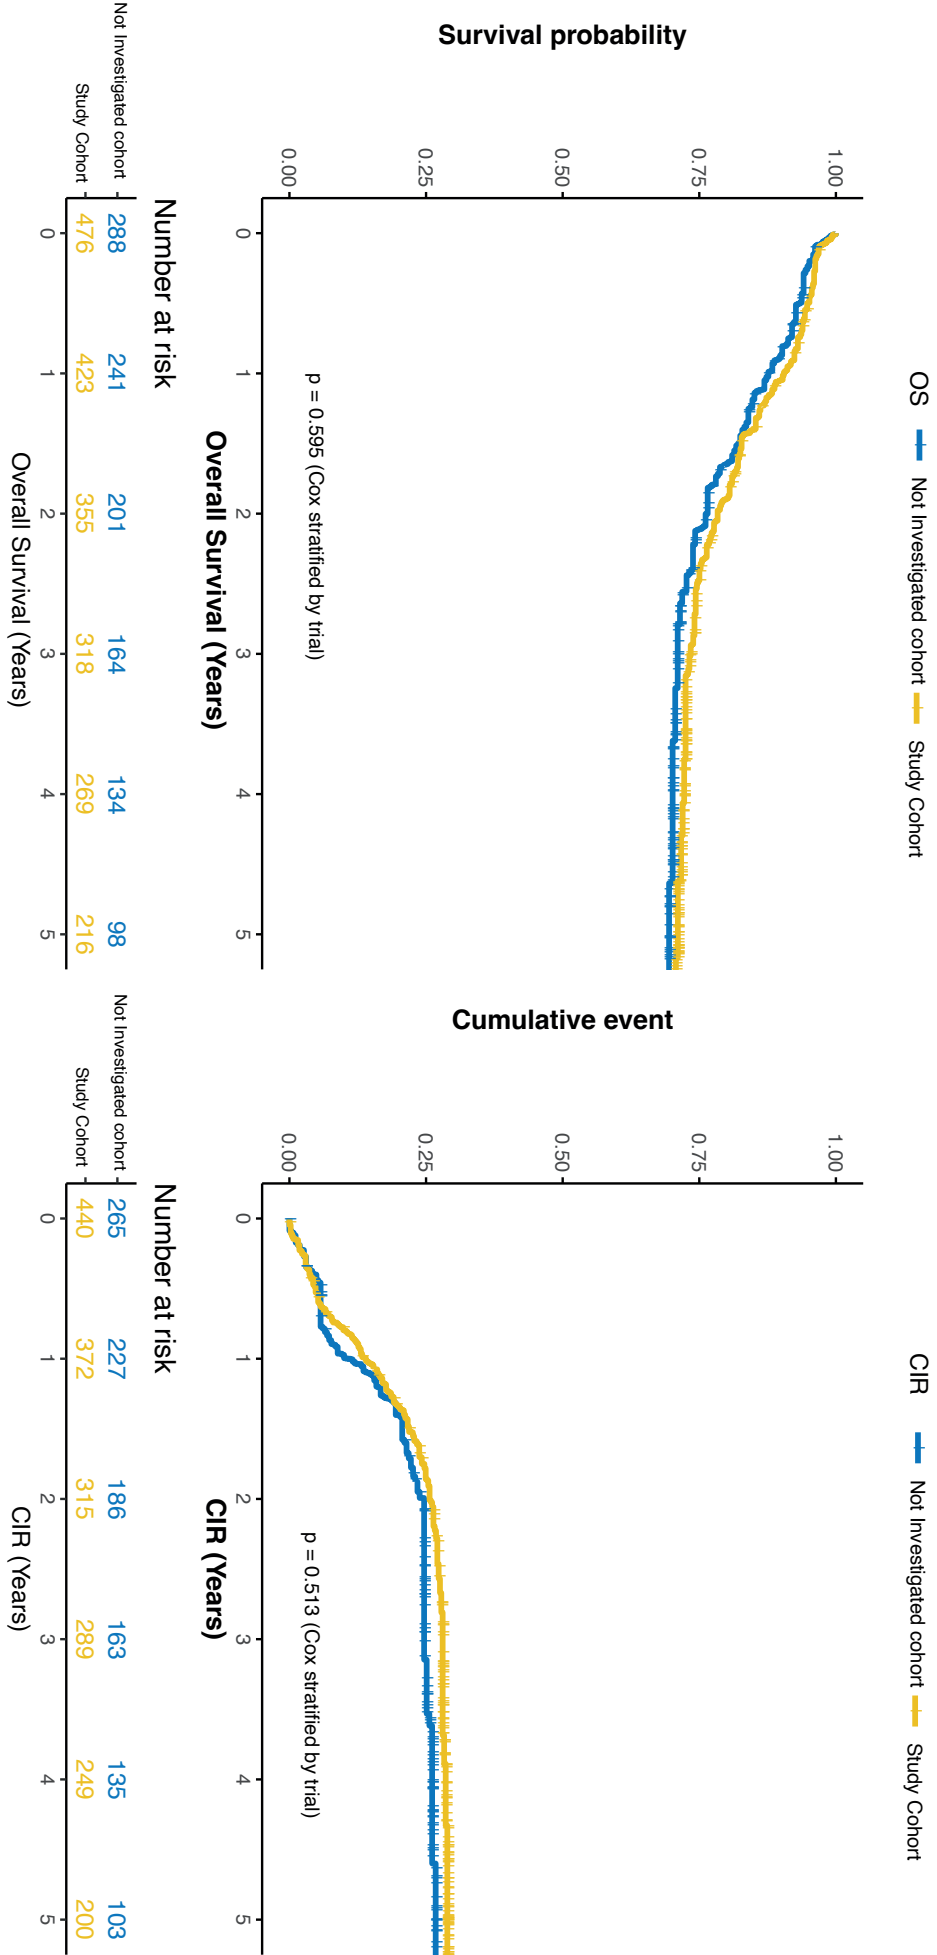

**Supplemental Figure 4. Co-occurrences and mutual exclusions of genetic alterations in *TP53*<sup>del</sup> and *TP53*<sup>WT</sup> T-ALL.**

The colors of the scale bar denote the nature of the correlation, with +1 indicating a perfectly positive correlation (blue) and -1 indicating a perfectly negative correlation (orange) between two alterations. The significance level of co-occurrences or mutual exclusions are depicted as followed: \* indicating a p-value < 0.05, \*\* a p-value < 0.01 and \*\*\* a p-value < 0.001. The co-occurrences and mutual exclusions were computed with the DISCOVER algorithm (R software)

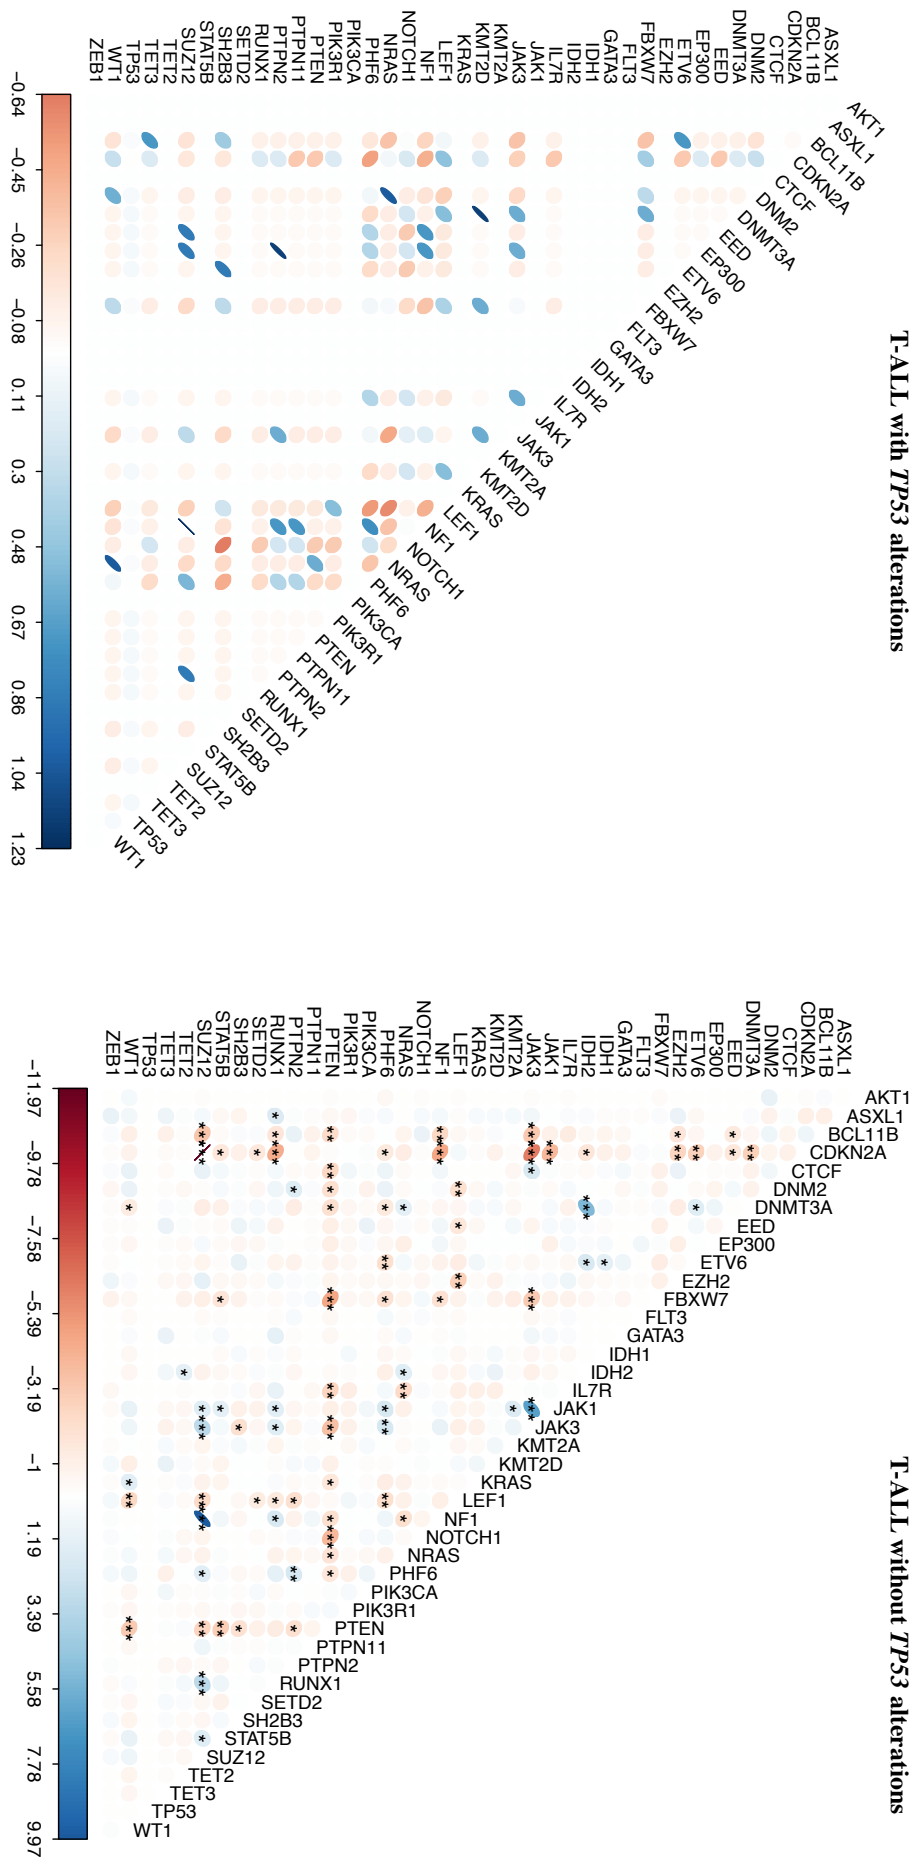



## Transcription Factors

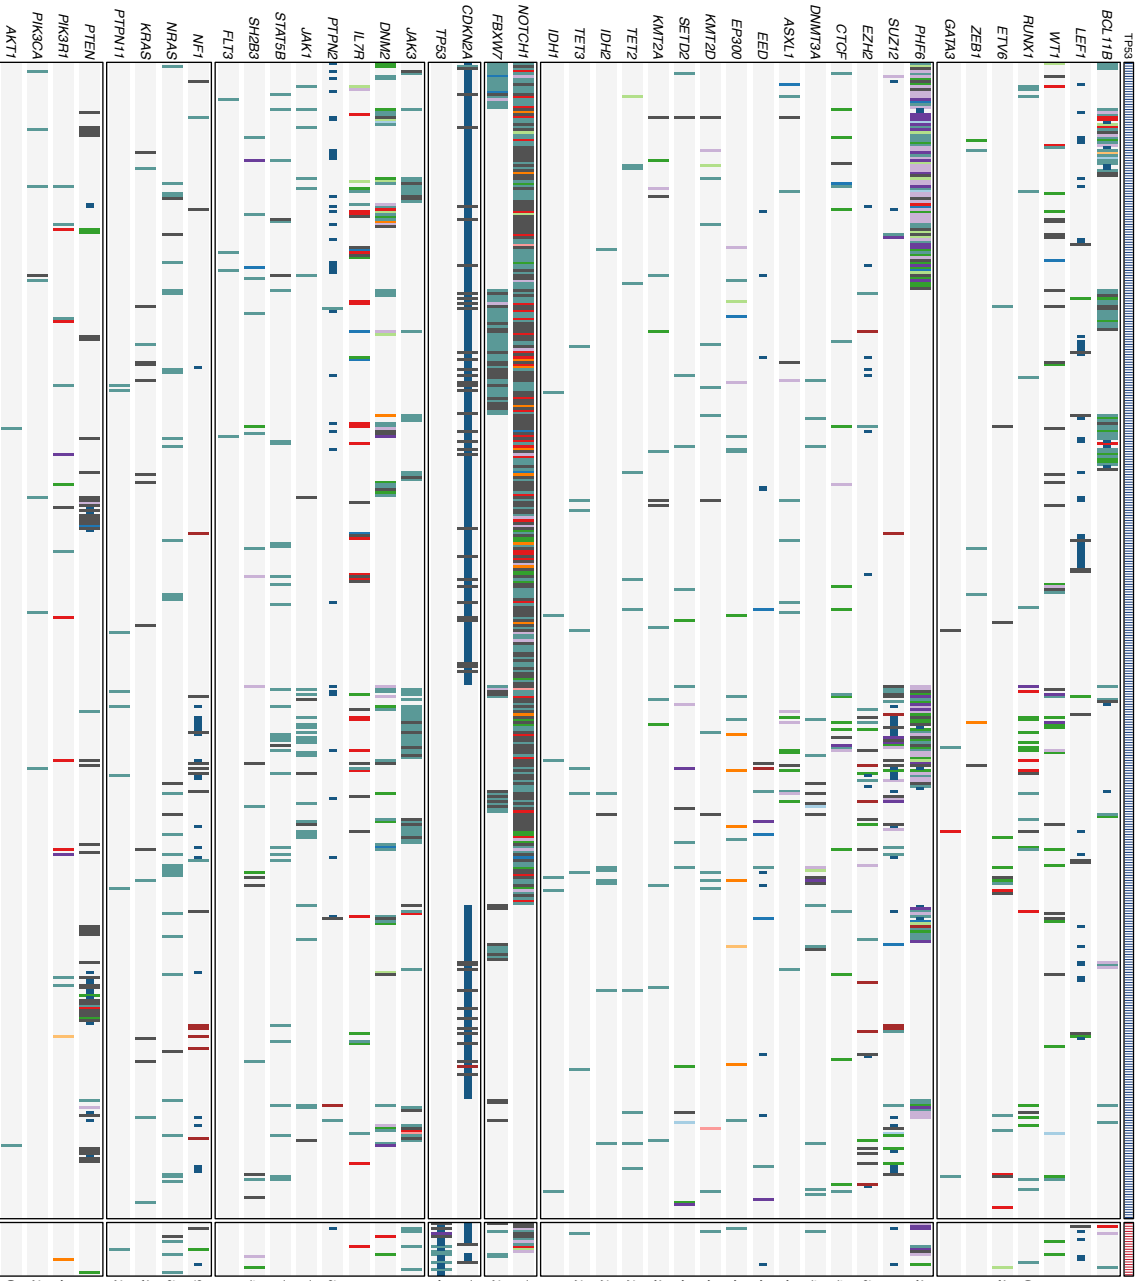

Supplemental Figure 6.

Oncoplot depicting the genetic anomalies observed in *TP53* Altered T-ALL cases. Genes are classified by functional groups.

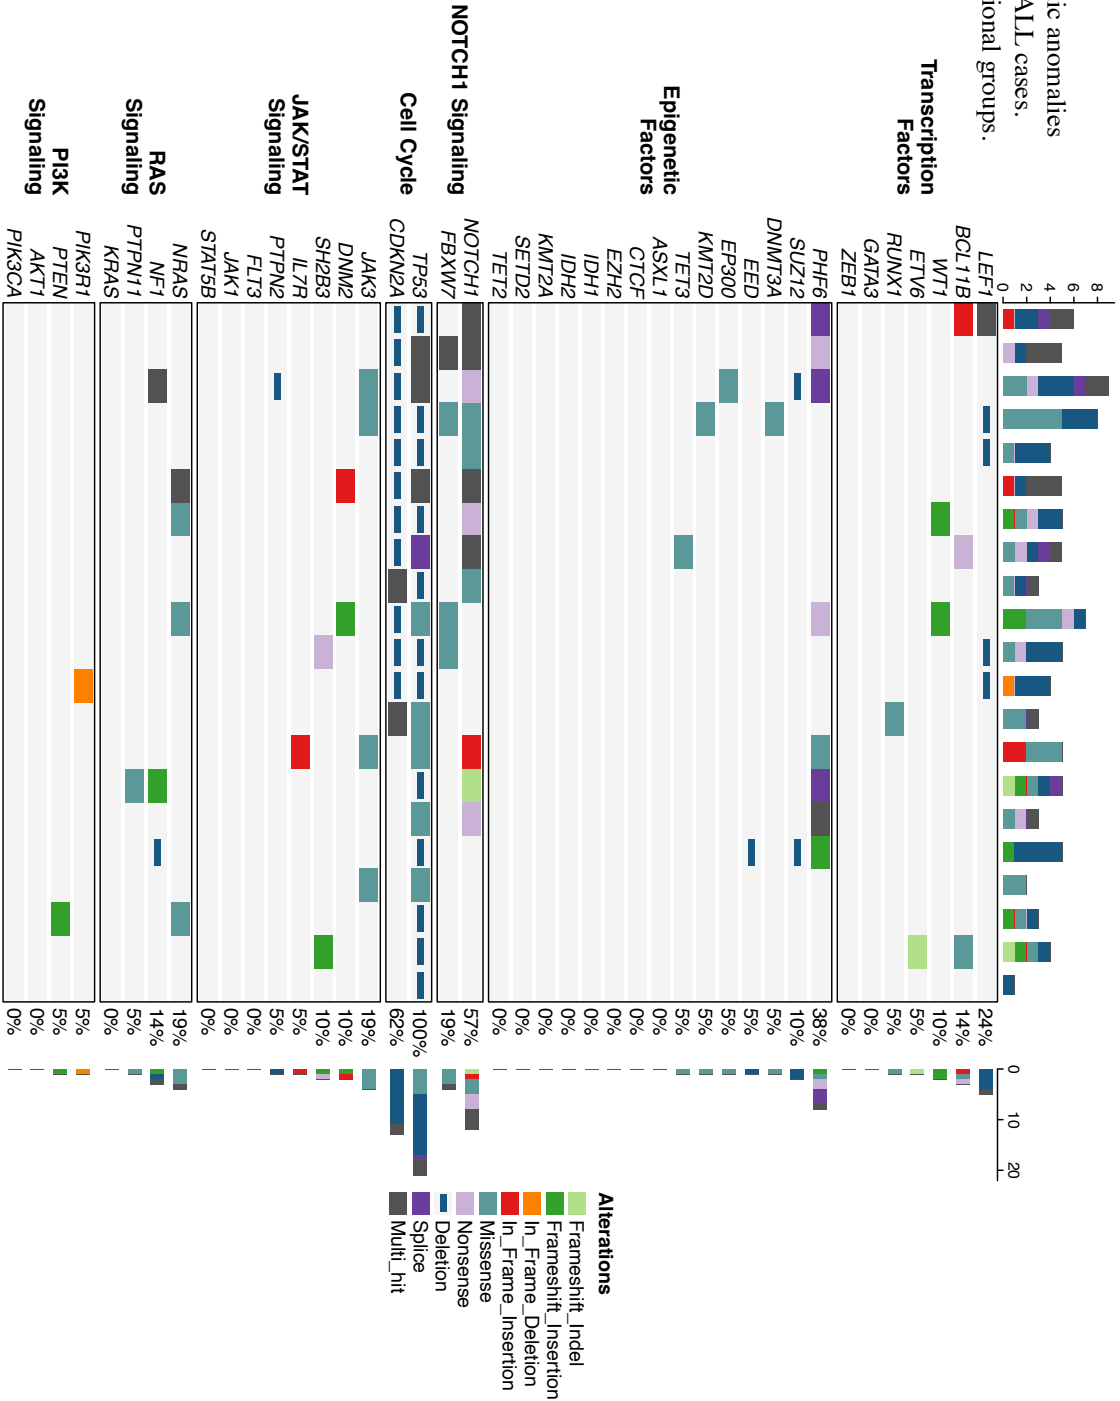

**Supplemental Figure 7.**  
OS and CIR of FRALLE2000 (pediatric) and GRAALL0305 (adults) patients

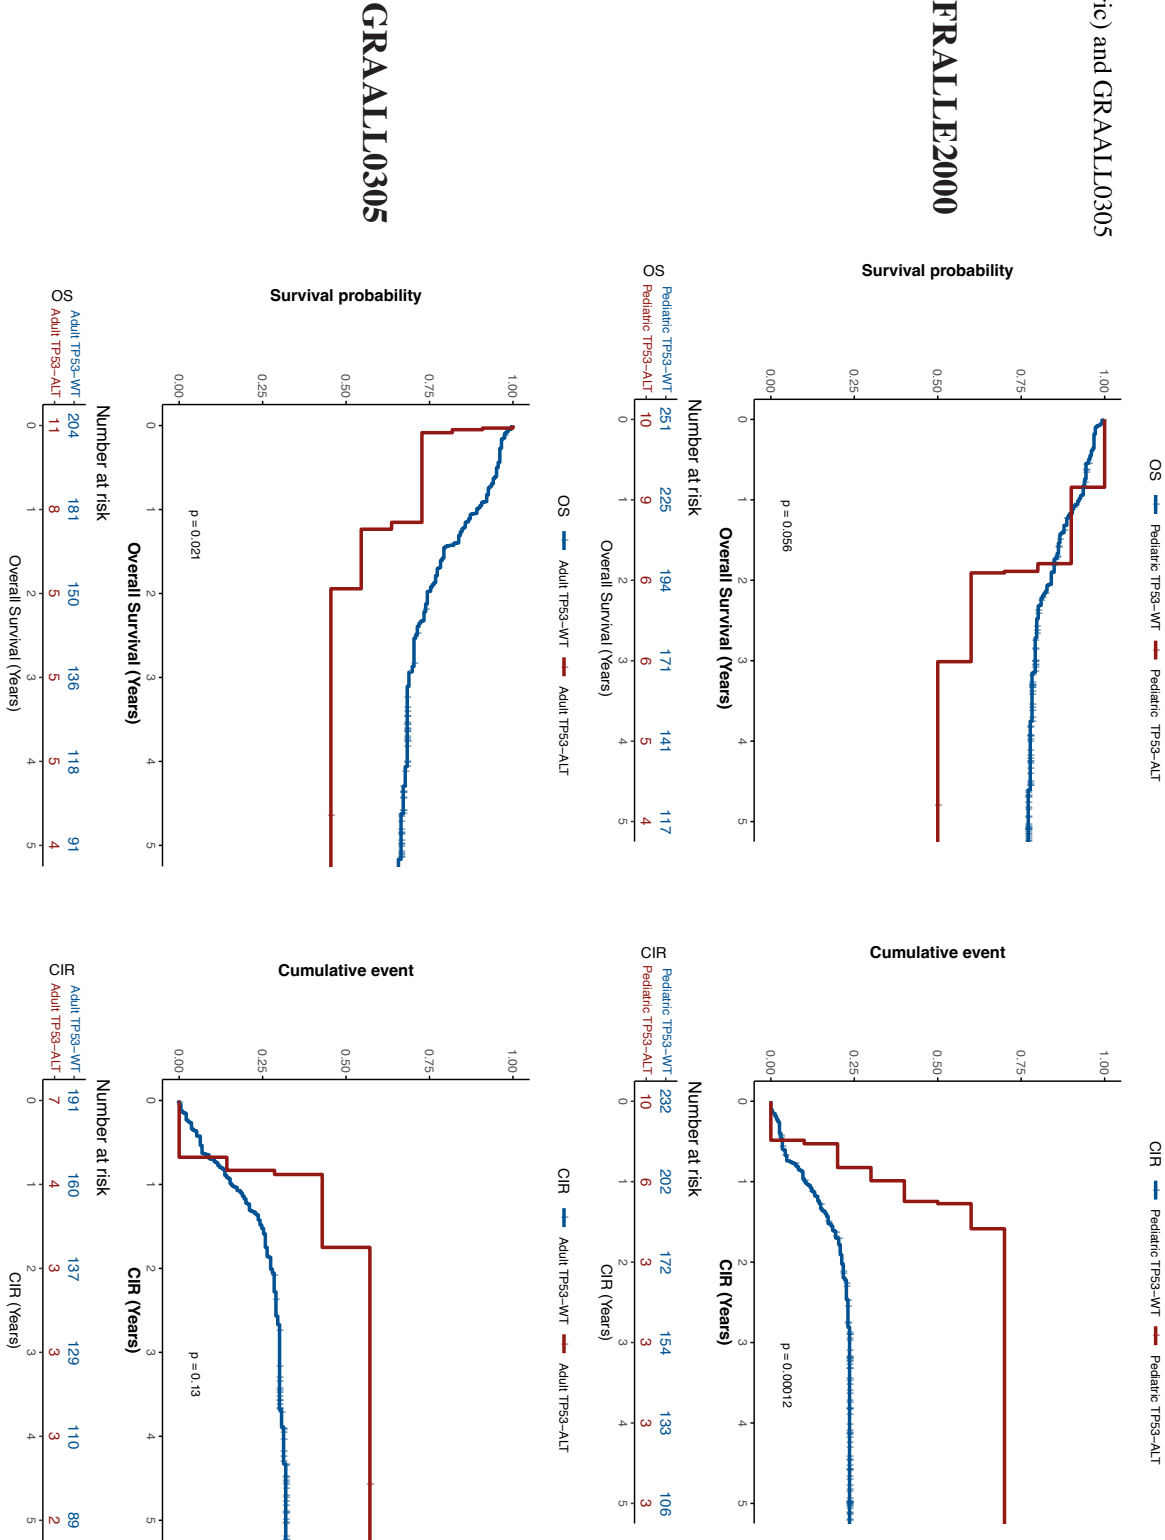

Supplement: blood_bld-2022-017755-mmc1.pdf [file blood_bld-2022-017755-mmc1.pdf]
